# Supplementary material
Source: MDPI journal article supplement (https://www.mdpi.com/2073-4441/14/6/856)
Supplement: s1 [file s1]

## Supplementary Information

**Table S1.** Composition of the synthetic groundwater

| Components                           | Concentration<br>(mg L <sup>-1</sup> ) | Trace elements                        | Concentration<br>(mg L <sup>-1</sup> ) |
|--------------------------------------|----------------------------------------|---------------------------------------|----------------------------------------|
| KNO <sub>3</sub>                     | 30.3                                   | ZnCl <sub>2</sub>                     | 0.2                                    |
| NaHCO <sub>3</sub>                   | 16.9                                   | CoCl <sub>2</sub> ·6H <sub>2</sub> O  | 0.2                                    |
| NaAsO <sub>2</sub>                   | 16.9                                   | MnSO <sub>4</sub> ·H <sub>2</sub> O   | 1.6                                    |
| NaH <sub>2</sub> PO <sub>4</sub>     | 6.2                                    | CuSO <sub>4</sub> ·5H <sub>2</sub> O  | 0.2                                    |
| CaCl <sub>2</sub>                    | 5.5                                    | NaMoO <sub>4</sub> ·2H <sub>2</sub> O | 0.2                                    |
| MgCl <sub>2</sub> ·6H <sub>2</sub> O | 10.15                                  | NiCl <sub>2</sub> ·6H <sub>2</sub> O  | 0.4                                    |

**Table S2.** Cost analysis table of regeneration process.

| Process             | Chemical | unit price<br>(¥ kg <sup>-1</sup> ) | Consumption<br>(kg kg <sup>-1</sup> FFA-1) | Cost<br>(¥ kg <sup>-1</sup> FFA-1) |
|---------------------|----------|-------------------------------------|--------------------------------------------|------------------------------------|
| alkali cleaning (C) | NaOH     | 6.6                                 | 0.0325                                     | 0.21                               |
| acid pickling (D)   | HCl      | 7.6                                 | 0.15                                       | 1.14                               |

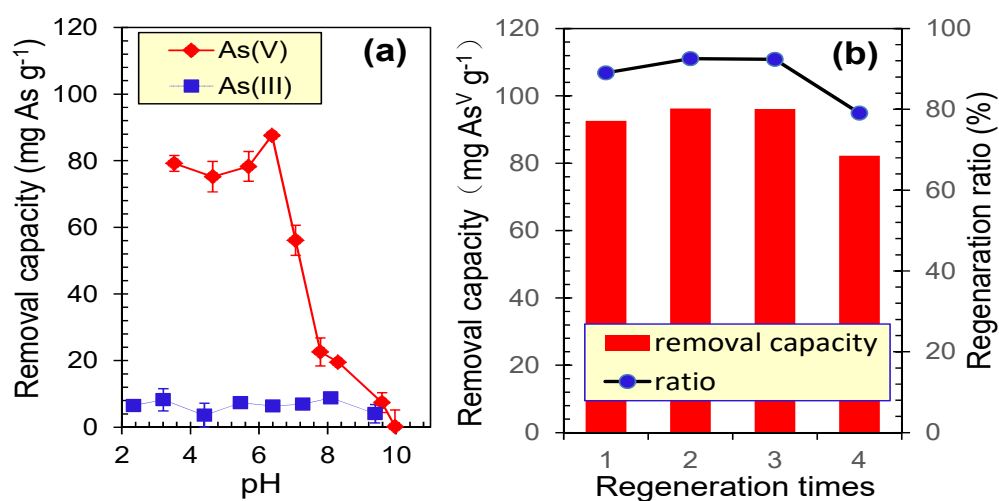

**Figure S1.** Effect of pH (a) and regeneration time (b) on FFA-1 to As(V) removal capacity.
